# Supplementary material for: Significant continental source of ice-nucleating particles at the tip of Chile’s southernmost Patagonia region
Source: Copernicus journal article supplement (doi:10.5194/acp-2022-71), 2022-03-09
Supplement: Supplementary file 1 [file acp-2022-71-supplement-version5.pdf]

# Significant continental source of ice-nucleating particles at the tip of Chile's southernmost Patagonia region

Xianda Gong<sup>1</sup>, Martin Radenz<sup>1</sup>, Heike Wex<sup>1</sup>, Patric Seifert<sup>1</sup>, Farnoush Ataei<sup>1</sup>, Silvia Henning<sup>1</sup>, Holger Baars<sup>1</sup>, Boris Barja<sup>2</sup>, Albert Ansmann<sup>1</sup>, and Frank Stratmann<sup>1</sup>

<sup>1</sup>Leibniz Institute for Tropospheric Research, Leipzig, Germany

<sup>2</sup>Laboratorio de Investigaciones Atmosféricas, Universidad de Magallanes (UMAG), Punta Arenas, Chile

**Correspondence:** Xianda Gong (gong@tropos.de)

## S1 Sample information

**Table S1.** The information of PM<sub>10</sub> filter samples, including sample number, start time, end time, duration, total sampling volume, sampling volume per well, and sample groups.

| Sample Number | Start Time          | End Time            | Duration | Total Volume | Volume Per Droplet | Volume Per Well | Group        |
|---------------|---------------------|---------------------|----------|--------------|--------------------|-----------------|--------------|
| -             | yyyy/mm/dd hh:mm:ss | yyyy/mm/dd hh:mm:ss | [hour]   | [L]          | [L]                | [L]             | -            |
| Sample01      | 2019/05/08 16:46:00 | 2019/05/15 16:46:00 | 168.00   | 87292.80     | 29.0976            | 703.1920        | CH           |
| Sample02      | 2019/05/22 16:00:00 | 2019/05/29 16:00:00 | 168.00   | 87292.80     | 29.0976            | 703.1920        | CH           |
| Sample03      | 2019/05/29 16:00:00 | 2019/06/04 16:00:00 | 144.00   | 74822.40     | 24.9408            | 602.7360        | CH           |
| Sample04      | 2019/06/04 16:00:00 | 2019/06/20 16:00:00 | 384.00   | 199526.40    | 66.5088            | 1607.2960       | CH           |
| Sample05      | 2019/06/20 16:00:00 | 2019/07/02 16:00:00 | 288.00   | 149644.80    | 37.4112            | 911.8980        | CH           |
| Sample06      | 2019/07/02 16:00:00 | 2019/07/09 16:00:00 | 168.00   | 87292.80     | 21.8232            | 531.9405        | CH           |
| Sample07      | 2019/07/09 16:00:00 | 2019/07/17 16:00:00 | 192.00   | 99763.20     | 33.2544            | 803.6480        | CH           |
| Sample08      | 2019/07/17 16:00:00 | 2019/07/31 16:00:00 | 336.00   | 174585.60    | 58.1952            | 1406.3840       | CH           |
| Sample09      | 2019/07/31 16:00:00 | 2019/08/08 16:00:00 | 192.00   | 99763.20     | 33.2544            | 803.6480        | CH           |
| Sample10      | 2019/08/08 16:00:00 | 2019/08/14 16:00:00 | 144.00   | 74822.40     | 18.7056            | 455.9490        | CH           |
| Sample11      | 2019/08/14 16:00:00 | 2019/08/22 16:00:00 | 192.00   | 99763.20     | 24.9408            | 607.9320        | CL           |
| Sample12      | 2019/08/22 16:00:00 | 2019/08/29 16:00:00 | 168.00   | 87292.80     | 21.8232            | 531.9405        | CH           |
| Sample13      | 2019/08/29 16:00:00 | 2019/09/05 16:00:00 | 168.00   | 87292.80     | 21.8232            | 531.9405        | CH           |
| Sample14      | 2019/09/05 16:00:00 | 2019/09/26 16:00:00 | 504.00   | 261878.40    | 87.2928            | 2109.5760       | CH           |
| Sample15      | 2019/09/26 16:00:00 | 2019/10/03 16:00:00 | 168.00   | 87292.80     | 29.0976            | 703.1920        | CH           |
| Sample16      | 2019/10/03 16:00:00 | 2019/10/09 16:00:00 | 144.00   | 74822.40     | 24.9408            | 602.7360        | WL           |
| Sample17      | 2019/10/09 16:00:00 | 2019/10/16 16:00:00 | 168.00   | 87292.80     | 29.0976            | 703.1920        | WL           |
| Sample18      | 2019/10/16 16:00:00 | 2019/10/23 16:00:00 | 168.00   | 87292.80     | 29.0976            | 703.1920        | WL           |
| Sample19      | 2019/10/23 16:00:00 | 2019/11/06 16:00:00 | 336.00   | 174585.60    | 58.1952            | 1406.3840       | WL           |
| Sample20      | 2019/11/06 16:00:00 | 2019/11/13 16:00:00 | 168.00   | 87292.80     | 29.0976            | 703.1920        | WL           |
| Sample21      | 2019/11/13 16:00:00 | 2019/11/20 16:00:00 | 168.00   | 87292.80     | 21.8232            | 531.9405        | WH           |
| Sample22      | 2019/11/20 16:00:00 | 2019/11/27 16:00:00 | 168.00   | 87292.80     | 29.0976            | 703.1920        | WH           |
| Sample23      | 2019/11/27 16:00:00 | 2019/12/04 16:00:00 | 168.00   | 87292.80     | 29.0976            | 703.1920        | WL           |
| Sample24      | 2019/12/04 16:00:00 | 2019/12/11 16:00:00 | 168.00   | 87292.80     | 29.0976            | 703.1920        | WL           |
| Sample25      | 2019/12/11 16:00:00 | 2019/12/18 16:00:00 | 168.00   | 87292.80     | 21.8232            | 531.9405        | WL           |
| Sample26      | 2019/12/18 16:00:00 | 2019/12/26 16:00:00 | 192.00   | 99763.20     | 33.2544            | 803.6480        | WL           |
| Sample27      | 2019/12/26 16:00:00 | 2020/01/06 16:00:00 | 264.00   | 137174.40    | 45.7248            | 1105.0160       | WL           |
| Sample28      | 2020/01/06 16:00:00 | 2020/01/15 16:00:00 | 216.00   | 112233.60    | 28.0584            | 683.9235        | WL           |
| Sample29      | 2020/01/15 16:00:00 | 2020/01/22 16:00:00 | 168.00   | 87292.80     | 21.8232            | 531.9405        | WL           |
| Sample30      | 2020/01/22 16:00:00 | 2020/01/29 16:00:00 | 168.00   | 87292.80     | 21.8232            | 531.9405        | WL           |
| Sample31      | 2020/01/29 16:00:00 | 2020/02/05 16:00:00 | 168.00   | 87292.80     | 21.8232            | 531.9405        | WH           |
| Sample32      | 2020/02/05 16:00:00 | 2020/02/12 16:00:00 | 168.00   | 87292.80     | 21.8232            | 531.9405        | WH           |
| Sample33      | 2020/02/12 16:00:00 | 2020/02/19 16:00:00 | 168.00   | 87292.80     | 21.8232            | 531.9405        | WH           |
| Blind01       | 2019/04/02          | 2019/04/25          | -        | -            | -                  | -               | Blind filter |
| Blind02       | 2019/05/28          | 2019/06/04          | -        | -            | -                  | -               | Blind filter |
| Blind03       | 2019/07/02          | 2019/07/09          | -        | -            | -                  | -               | Blind filter |
| Blind04       | 2019/07/02          | 2019/07/09          | -        | -            | -                  | -               | Blind filter |
| Blind05       | 2019/07/09          | 2019/07/17          | -        | -            | -                  | -               | Blind filter |
| Blind06       | 2019/07/09          | 2019/07/17          | -        | -            | -                  | -               | Blind filter |

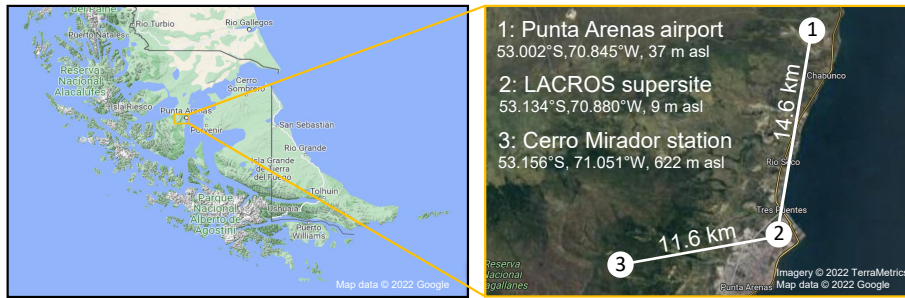

**Figure S1.** Map of the area surrounding Punta Arenas in the left panel. Location and distance of three measurement stations in the right panel.

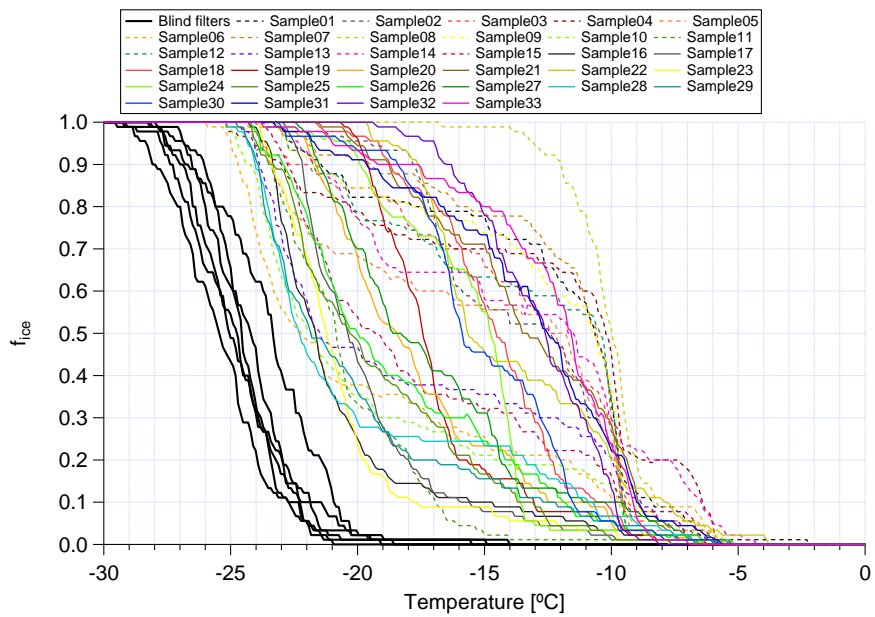

**Figure S2.** Frozen fraction ( $f_{ice}$ ) of filter samples measured by LINA (Leipzig Ice Nucleation Array) as a function of temperature.

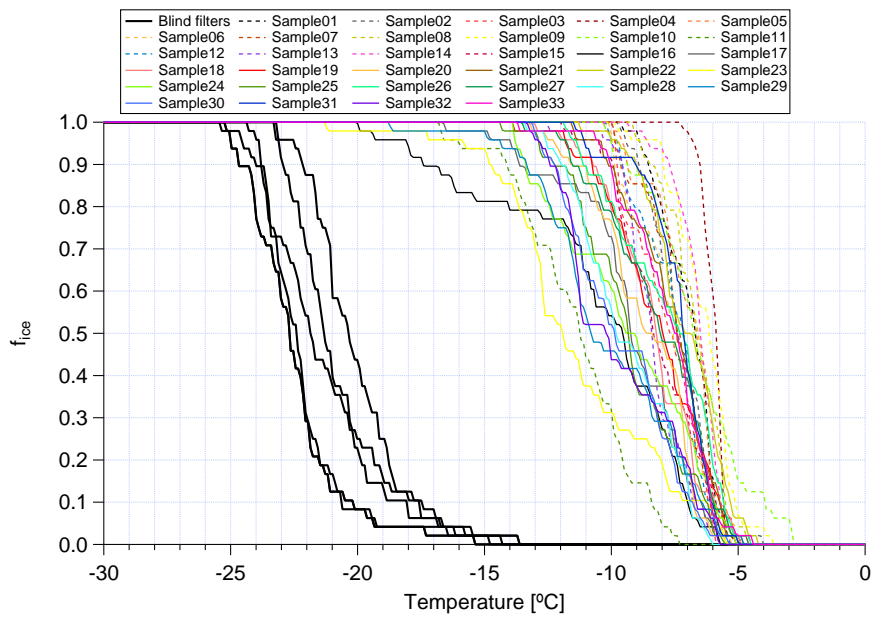

**Figure S3.** Frozen fraction ( $f_{ice}$ ) of unheated filter samples measured by INDA (Leipzig Ice Nucleation Array) as a function of temperature.

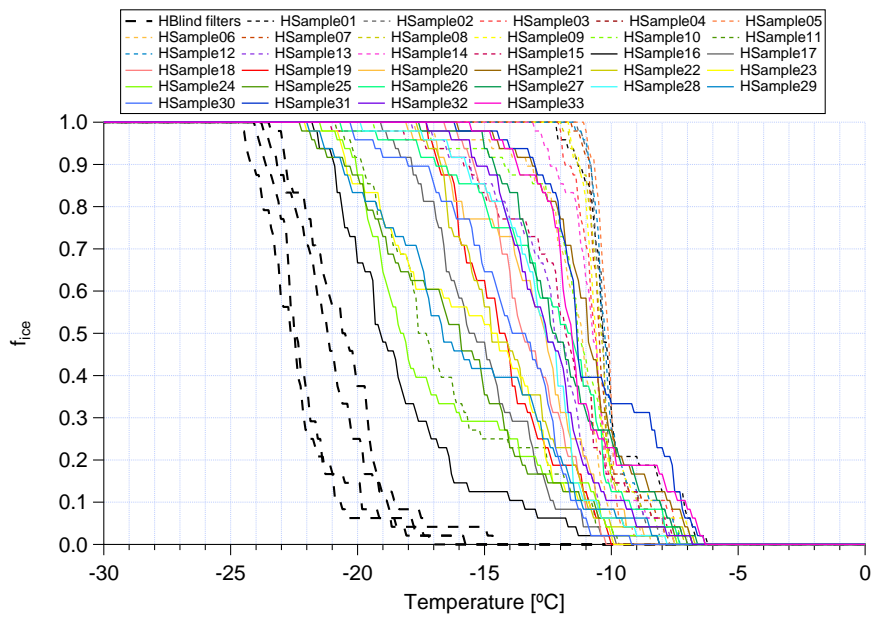

**Figure S4.** Frozen fraction ( $f_{ice}$ ) of heated filter samples measured by INDA (Leipzig Ice Nucleation Array) as a function of temperature.

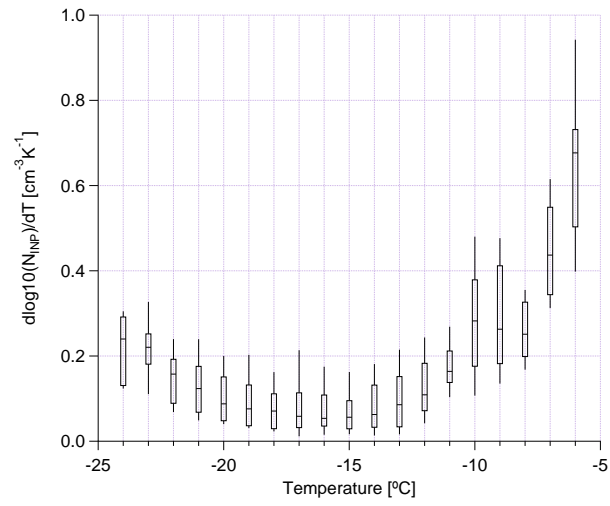

**Figure S5.** The increase rate of  $N_{\text{INP}}$  as a function of temperature.

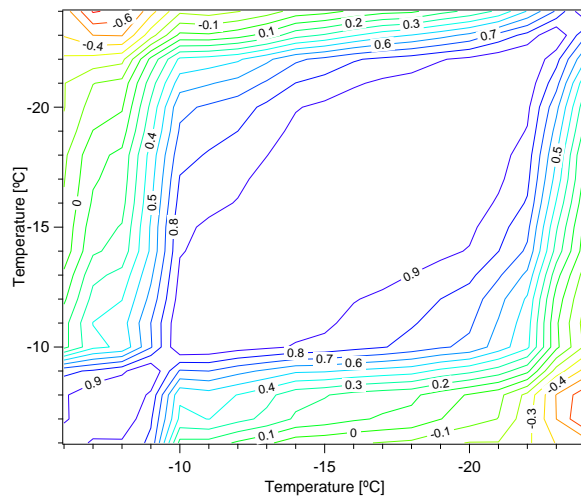

**Figure S6.** The contour plot of correlation coefficient between  $N_{INP}$  at different temperatures.



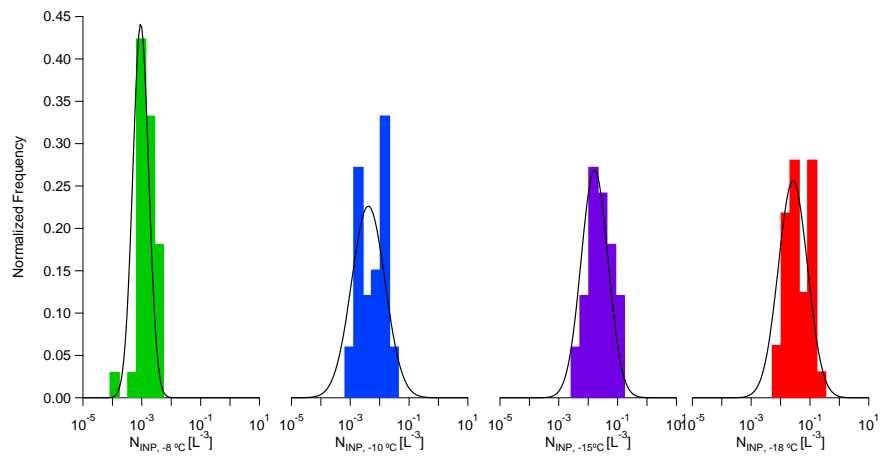

**Figure S7.** Frequency distribution of measured  $N_{\text{INP}}$  at  $-8$ ,  $-10$ ,  $-15$  and  $-18^\circ\text{C}$  with lognormal fit curves.
